# Supplementary material
Source: PubMed Central journal article supplement (PMC5392255)
Supplement: NIHMS854059-supplement-supplement_1.pdf [file NIHMS854059-supplement-supplement_1.pdf]

207 **Appendices – Supplemental material**

208 **Appendix A: Definition of explanatory variables used in regressions (Eq. 2)**

209 **Table S1.** Definition of explanatory variables used in regressions, children  $2 \leq \text{age} \leq 7$  in 2002,  
 210 but age  $\leq 11$  by 2010

| Category       | Variable definition      | Variable name                                                                                                                                                                                                                                                       |
|----------------|--------------------------|---------------------------------------------------------------------------------------------------------------------------------------------------------------------------------------------------------------------------------------------------------------------|
| I. Child:      | Birth order              | Pseudo birth order; 1 = youngest, 2 = next youngest, etc. Birth order determined by child's age in household, not by asking mother about the exact birth order of the child. This variable only includes children living in the household at the time of the survey |
|                | Lagged weight            | Weight of subject during previous year                                                                                                                                                                                                                              |
|                | Age                      | Best estimate of child's age in whole years                                                                                                                                                                                                                         |
|                | Male                     | Child's sex: 1 = male, 0 = female                                                                                                                                                                                                                                   |
|                | Dry-season birth         | Subject was born during the dry season (May - July); 1 = yes, 0 = no                                                                                                                                                                                                |
|                | Survival                 | Number of times child appears in the panel                                                                                                                                                                                                                          |
| II. Mother:    | Baseline age             | Best estimate of mother's age in whole years at baseline                                                                                                                                                                                                            |
|                | Schooling                | Mother's maximum school grade attained                                                                                                                                                                                                                              |
|                | Current height           | Measured standing physical height of child's mother (cm)                                                                                                                                                                                                            |
|                | Current weight           | Mother's weight in kg                                                                                                                                                                                                                                               |
| III. Household | No. of children          | Number of children in the household                                                                                                                                                                                                                                 |
|                | Current income           | Natural log of household monetary income earned during the 2 weeks before the day of the interview. Income sources include money from sales and wage labor                                                                                                          |
|                | Current wealth           | Natural log of the monetary value of sum of stock of domesticated animals + asset wealth in goods produced locally (e.g., canoes), and commercial goods owned by the entire household                                                                               |
|                | Forest clearance         | Natural logarithm of old-growth and fallow forest cleared by the household during the year before the interview. Raw variable measured in <i>tareas</i> (10 <i>tareas</i> = 1 hectare). Proxies for annual household income                                         |
| Community      | Village fixed attributes | Full set of dummy variables for villages ( $n = 13 - 1 = 12$ )                                                                                                                                                                                                      |

211 **Appendix B: Standing height and annual height increments during the panel study**

212 **Table S2.** Pairwise correlations between heights during 2002 through 2010 for Tsimane’  
 213 children  $2 \leq \text{age} \leq 7$  at baseline (2002) but no more than 11 years old by 2010.

| Age | 2    | 3    | 4    | 5    | 6    | 7    | 8    | 9    | 10   | 11 |
|-----|------|------|------|------|------|------|------|------|------|----|
| 2   | 1    |      |      |      |      |      |      |      |      |    |
| 3   | 0.85 | 1    |      |      |      |      |      |      |      |    |
| 4   | 0.79 | 0.81 | 1    |      |      |      |      |      |      |    |
| 5   | 0.77 | 0.85 | 0.91 | 1    |      |      |      |      |      |    |
| 6   | 0.74 | 0.78 | 0.88 | 0.89 | 1    |      |      |      |      |    |
| 7   | 0.67 | 0.75 | 0.84 | 0.89 | 0.89 | 1    |      |      |      |    |
| 8   | 0.40 | 0.58 | 0.72 | 0.77 | 0.83 | 0.88 | 1    |      |      |    |
| 9   | 0.58 | 0.66 | 0.84 | 0.83 | 0.86 | 0.89 | 0.88 | 1    |      |    |
| 10  | 0.62 | 0.60 | 0.70 | 0.79 | 0.76 | 0.78 | 0.79 | 0.88 | 1    |    |
| 11  | -    | 0.57 | 0.73 | 0.71 | 0.75 | 0.77 | 0.84 | 0.88 | 0.83 | 1  |

214 **Notes:** The results in the table show higher correlations between measurements at older ages and shorter  
 215 measurement intervals, consistent with Cole (1997).

216 **Table S3.** Standing height and annual height increments in cm during 2002 - 2010 for Tsimane' children,  $2 \leq \text{age} \leq 7$  at baseline  
 217 (2002) but no more than 11 years old by 2010

| Age in<br>2002 | Sex   | Standing height in cm during: |       |      |      |       |      |      |       |      |      |       |      |      |       |      |
|----------------|-------|-------------------------------|-------|------|------|-------|------|------|-------|------|------|-------|------|------|-------|------|
|                |       | 2002                          |       |      | 2003 |       |      | 2004 |       |      | 2005 |       |      | 2006 |       |      |
|                |       | N                             | M     | SD   | N    | M     | SD   | N    | M     | SD   | N    | M     | SD   | N    | M     | SD   |
| 2              | Girls | 37                            | 80.8  | 4.3  | 26   | 86.9  | 3.6  | 30   | 93.4  | 3.9  | 31   | 99.5  | 3.7  | 29   | 106.1 | 3.3  |
|                | Boys  | 33                            | 81.4  | 5.0  | 22   | 87.2  | 5.7  | 30   | 94.6  | 4.8  | 29   | 101.3 | 4.9  | 28   | 106.8 | 5.1  |
| 3              | Girls | 29                            | 89.4  | 4.6  | 21   | 93.1  | 4.4  | 24   | 100.4 | 3.2  | 24   | 106.6 | 3.5  | 21   | 111.8 | 2.9  |
|                | Boys  | 34                            | 89.0  | 5.6  | 28   | 93.6  | 5.3  | 23   | 100.7 | 5.6  | 24   | 105.9 | 4.6  | 23   | 111.9 | 6.1  |
| 4              | Girls | 29                            | 95.4  | 5.6  | 21   | 100.5 | 5.6  | 25   | 105.0 | 6.2  | 25   | 111.4 | 5.3  | 25   | 115.8 | 6.8  |
|                | Boys  | 32                            | 97.9  | 4.4  | 23   | 101.7 | 5.6  | 25   | 107.8 | 4.0  | 27   | 113.1 | 4.6  | 25   | 118.5 | 4.3  |
| 5              | Girls | 31                            | 103.6 | 5.4  | 25   | 107.5 | 4.6  | 25   | 113.7 | 5.0  | 26   | 117.5 | 5.3  | 25   | 123.3 | 6.1  |
|                | Boys  | 25                            | 103.7 | 6.0  | 22   | 107.4 | 5.2  | 24   | 112.4 | 4.9  | 23   | 117.2 | 5.2  | 23   | 122.3 | 4.7  |
| 6              | Girls | 48                            | 112.5 | 8.2  | 38   | 115.8 | 7.8  | 39   | 120.3 | 6.1  | 40   | 126.9 | 7.1  | 39   | 133.9 | 7.8  |
|                | Boys  | 55                            | 111.8 | 7.3  | 44   | 115.0 | 6.5  | 44   | 120.6 | 6.5  | 48   | 125.3 | 6.9  | 46   | 130.4 | 8.2  |
| <b>Total</b>   | Girls | 174                           | 97.5  | 13.3 | 131  | 102.4 | 12.3 | 143  | 107.5 | 11.3 | 146  | 113.4 | 11.4 | 139  | 119.6 | 12.0 |
|                | Boys  | 179                           | 98.2  | 12.8 | 139  | 102.9 | 11.8 | 146  | 108.6 | 11.2 | 151  | 114.2 | 10.7 | 145  | 119.6 | 10.9 |

218 **Notes:** N = number of observations. M = mean; SD = standard deviation. Sample includes all children in the 13 villages of TAPS. Height  
 219 measured following the protocol of Lohman et al. (1988), using a Seca 213 portable stadiometer. Blank cells means that the child's age >11. We  
 220 found no significant differences ( $p < 0.05$ ) in average change in standing height among cohorts when adjusting for age and sex composition.

221

222 **Table S3.** Continued

| Age in<br>2002 |       | Standing height in cm during: |       |      |      |       |     |      |       |     |      |       |     | Average change in height,<br>2002 - 2010 |     |     |     |
|----------------|-------|-------------------------------|-------|------|------|-------|-----|------|-------|-----|------|-------|-----|------------------------------------------|-----|-----|-----|
|                |       | 2007                          |       |      | 2008 |       |     | 2009 |       |     | 2010 |       |     | Annual change in:                        |     |     |     |
|                |       | N                             | M     | SD   | N    | M     | SD  | N    | M     | SD  | N    | M     | SD  | cm                                       |     | %   |     |
| Sex            | N     | M                             | SD    | N    | M    | SD    | N   | M    | SD    | N   | M    | SD    | M   | SD                                       | M   | SD  |     |
| 2              | Girls | 28                            | 112.2 | 3.1  | 27   | 117.8 | 4.4 | 22   | 122.7 | 4.8 | 24   | 129.4 | 6.3 | 5.9                                      | 0.6 | 5.7 | 0.5 |
|                | Boys  | 25                            | 112.4 | 5.6  | 26   | 119.0 | 8.5 | 23   | 123.4 | 5.1 | 25   | 127.4 | 5.8 | 5.7                                      | 0.6 | 5.6 | 0.6 |
| 3              | Girls | 19                            | 117.8 | 3.5  | 22   | 122.9 | 3.8 | 16   | 132.6 | 8.2 | 18   | 137.0 | 5.4 | 6.0                                      | 0.7 | 5.4 | 0.7 |
|                | Boys  | 24                            | 117.0 | 4.6  | 21   | 120.9 | 4.9 | 21   | 126.5 | 4.6 | 22   | 132.1 | 6.3 | 5.3                                      | 0.5 | 4.8 | 0.5 |
| 4              | Girls | 20                            | 121.7 | 8.0  | 21   | 128.4 | 9.1 | 20   | 134.6 | 9.6 |      |       |     | 5.6                                      | 0.7 | 4.9 | 0.5 |
|                | Boys  | 23                            | 123.8 | 4.8  | 22   | 128.9 | 4.8 | 17   | 133.3 | 4.8 |      |       |     | 5.2                                      | 0.5 | 4.5 | 0.4 |
| 5              | Girls | 22                            | 130.0 | 6.7  | 21   | 135.8 | 6.8 |      |       |     |      |       |     | 5.5                                      | 0.6 | 4.6 | 0.5 |
|                | Boys  | 21                            | 127.5 | 4.7  | 21   | 132.8 | 5.0 |      |       |     |      |       |     | 4.9                                      | 0.6 | 4.2 | 0.6 |
| 6              | Girls | 12                            | 136.6 | 7.0  |      |       |     |      |       |     |      |       |     | 5.8                                      | 1.0 | 4.7 | 0.7 |
|                | Boys  | 22                            | 132.4 | 6.0  |      |       |     |      |       |     |      |       |     | 4.6                                      | 0.8 | 3.7 | 0.7 |
| <b>Total</b>   | Girls | 101                           | 121.9 | 10.1 | 91   | 125.7 | 9.2 | 58   | 129.5 | 9.3 | 42   | 132.7 | 7.0 | 5.8                                      | 0.8 | 5.0 | 0.7 |
|                | Boys  | 115                           | 122.2 | 8.9  | 90   | 125.1 | 8.3 | 61   | 127.2 | 6.3 | 47   | 129.6 | 6.4 | 5.0                                      | 0.7 | 4.4 | 0.9 |

223 **Notes:** N = number of observations. M = mean; SD = standard deviation. Sample includes all children in the 13 villages of TAPS. Height  
224 measured following the protocol of Lohman et al. (1988) , using a Seca 213 portable stadiometer. Blank cells means that the child's age >11. We  
225 estimated the average change in height within individuals and present the mean and SD for each age group. We found no significant differences  
226 ( $p < 0.05$ ) in average change in standing height among cohorts when adjusting for age and sex composition.

227 **Appendix C: Linear growth and height deficits from WHO reference growth tables for selected middle-income countries and**  
 228 **the Tsimane’.**

229 **Table S4.** Measurements of linear growth, in cm and HAZ, and height deficits from WHO reference growth tables at 2 and 4 years of  
 230 age for middle-income countries from the Consortium of Health-orientated Research in Transitioning Societies (COHORTS) and the  
 231 Tsimane’

|                                         | Brazil      | Guatemala  | India      | South Africa | Tsimane’   |
|-----------------------------------------|-------------|------------|------------|--------------|------------|
| <b>Two years of age</b>                 |             |            |            |              |            |
| Height (cm)                             | 84.6 ± 3.8  | 78.1 ± 3.0 | 80.6 ± 3.5 | 83.2 ± 3.2   | 81.1 ± 4.6 |
| HAZ                                     | -0.6 ± 1.2  | -2.9 ± 0.9 | -1.9 ± 1.1 | -1.2 ± 1.0   | -2.4 ± 1.4 |
| Height deficit from WHO standards (cm)* | -1.5 ± 3.7  | -8.9 ± 2.9 | -6.6 ± 3.4 | -3.8 ± 3.1   | -5.3 ± 4.6 |
| <b>Four years of age</b>                |             |            |            |              |            |
| Height (cm)                             | 100.0 ± 4.7 | 93.4 ± 3.7 | 94.9 ± 4.1 | 99.0 ± 4.0   | 94.8 ± 5.0 |
| HAZ                                     | -0.6 ± 1.1  | -2.4 ± 0.9 | -1.9 ± 1.0 | -0.9 ± 0.9   | -2.1 ± 1.1 |
| Height deficit from WHO standards (cm)  | -2.2 ± 4.5  | -9.6 ± 3.6 | -8.1 ± 4.1 | -3.6 ± 3.9   | -7.2 ± 5.1 |

232 **Notes:** HAZ denotes height-for-age z score. Values shown in the table correspond to mean ± standard deviations. Data for Brazil, Guatemala,  
 233 India, and South Africa correspond to the COHORT study; data were obtained from Lundeen et al. (2014b), Table 1. We excluded the Philippines  
 234 from the comparison because of missing data for 4 years of age. \* Deficit corresponds to the difference with the 50th percentile for age- and sex-  
 235 specific height. The number shown corresponds to the mean and standard deviation of the difference between each individual and the WHO  
 236 standard.

237

238 **Appendix D: Mean HAZ and annual change in HAZ during the panel study**

239 **Table S5.** Mean height-for-age z score (HAZ) and annual change in HAZ during 2002 - 2010 for Tsimane' children,  $2 \leq \text{age} \leq 7$  at  
 240 baseline but no more than age 11 by 2010, measured annually during 2002 - 2010: Stunted ( $\text{HAZ} < -2$ ) and non-stunted ( $\text{HAZ} \geq -2$ )  
 241 children compared

|              |       | Mean height-for-age z score (HAZ) during: |      |      |      |      |      |      |      |      |      |      |      |      |      |      |
|--------------|-------|-------------------------------------------|------|------|------|------|------|------|------|------|------|------|------|------|------|------|
|              |       | 2002                                      |      |      | 2003 |      |      | 2004 |      |      | 2005 |      |      | 2006 |      |      |
| Age in 2002  | Sex   | T                                         | S    | NS   | T    | S    | NS   | T    | S    | NS   | T    | S    | NS   | T    | S    | NS   |
| 2            | Girls | -2.3                                      | -3.0 | -1.0 | -2.2 | -2.7 | -1.5 | -2.2 | -2.6 | -1.5 | -2.1 | -2.4 | -1.6 | -1.8 | -2.1 | -1.5 |
|              | Boys  | -2.5                                      | -3.4 | -0.9 | -2.5 | -3.2 | -1.2 | -2.1 | -2.5 | -1.2 | -1.8 | -2.3 | -1.1 | -1.9 | -2.3 | -1.2 |
| 3            | Girls | -2.0                                      | -3.1 | -1.1 | -2.2 | -2.9 | -1.5 | -1.8 | -2.3 | -1.4 | -1.6 | -2.0 | -1.3 | -1.7 | -2.0 | -1.4 |
|              | Boys  | -2.4                                      | -3.4 | -0.9 | -2.3 | -3.0 | -1.4 | -2.0 | -2.7 | -1.1 | -2.0 | -2.5 | -1.3 | -1.9 | -2.5 | -1.0 |
| 4            | Girls | -2.1                                      | -2.8 | -1.0 | -1.9 | -2.5 | -0.8 | -2.0 | -2.6 | -1.0 | -1.7 | -2.2 | -1.0 | -1.9 | -2.6 | -0.9 |
|              | Boys  | -1.8                                      | -2.9 | -1.2 | -1.9 | -3.1 | -1.2 | -1.8 | -2.5 | -1.3 | -1.7 | -2.4 | -1.3 | -1.6 | -2.3 | -1.3 |
| 5            | Girls | -1.4                                      | -2.6 | -0.8 | -1.4 | -2.3 | -1.0 | -1.3 | -2.1 | -0.9 | -1.5 | -2.3 | -1.0 | -1.5 | -2.3 | -0.9 |
|              | Boys  | -1.6                                      | -2.8 | -0.7 | -1.8 | -2.6 | -1.0 | -1.8 | -2.6 | -1.1 | -1.8 | -2.6 | -1.1 | -1.8 | -2.4 | -1.2 |
| 6            | Girls | -1.5                                      | -2.7 | -0.8 | -1.6 | -2.6 | -1.0 | -1.8 | -2.7 | -1.3 | -1.6 | -2.7 | -1.1 | -1.5 | -2.5 | -0.9 |
|              | Boys  | -1.6                                      | -3.0 | -0.9 | -1.8 | -2.7 | -1.3 | -1.6 | -2.8 | -1.2 | -1.7 | -2.8 | -1.2 | -1.6 | -2.7 | -1.2 |
| <b>Total</b> | Girls | -1.8                                      | -2.9 | -0.9 | -1.8 | -2.6 | -1.1 | -1.8 | -2.5 | -1.2 | -1.7 | -2.3 | -1.2 | -1.7 | -2.3 | -1.1 |
|              | Boys  | -2.0                                      | -3.2 | -0.9 | -2.0 | -2.9 | -1.2 | -1.8 | -2.6 | -1.2 | -1.8 | -2.5 | -1.2 | -1.7 | -2.4 | -1.2 |

242 **Notes:** T = total; S = stunted ( $\text{HAZ} < -2$  SD); NS = not stunted ( $\text{HAZ} \geq -2$  SD).

243 **Table S5. Continued**

244

| Age in<br>2002 | Sex   | Mean height-for-age z score (HAZ) during: |      |      |      |      |      |      |      |      |      |      |      | Change in mean<br>HAZ, 2002-2010 |     |      | % stunted at<br>baseline, but not<br>at end-line |
|----------------|-------|-------------------------------------------|------|------|------|------|------|------|------|------|------|------|------|----------------------------------|-----|------|--------------------------------------------------|
|                |       | 2007                                      |      |      | 2008 |      |      | 2009 |      |      | 2010 |      |      | End-line – 2002                  |     |      |                                                  |
|                |       | T                                         | S    | NS   | T    | S    | NS   | T    | S    | NS   | T    | S    | NS   | T                                | S   | NS   |                                                  |
| 2              | Girls | -1.7                                      | -1.9 | -1.4 | -1.6 | -1.7 | -1.4 | -1.7 | -1.9 | -1.4 | -1.6 | -1.9 | -1.1 | 0.7                              | 1.1 | -0.1 | 75                                               |
|                | Boys  | -1.8                                      | -2.2 | -1.1 | -1.5 | -1.7 | -1.1 | -1.5 | -1.7 | -1.1 | -1.7 | -2.0 | -1.0 | 0.9                              | 1.4 | -0.1 | 77                                               |
| 3              | Girls | -1.6                                      | -2.0 | -1.3 | -1.6 | -2.0 | -1.3 | -1.0 | -1.7 | -0.4 | -1.3 | -1.7 | -0.9 | 0.7                              | 1.4 | 0.2  | 69                                               |
|                | Boys  | -1.9                                      | -2.3 | -1.3 | -2.0 | -2.3 | -1.5 | -1.8 | -2.1 | -1.3 | -1.7 | -2.1 | -1.1 | 0.7                              | 1.2 | -0.2 | 70                                               |
| 4              | Girls | -1.9                                      | -2.5 | -0.9 | -1.7 | -2.5 | -0.7 | -1.6 | -2.3 | -0.6 |      |      |      | 0.5                              | 0.5 | 0.4  | 59                                               |
|                | Boys  | -1.6                                      | -2.3 | -1.1 | -1.5 | -2.1 | -1.1 | -1.6 | -2.0 | -1.3 |      |      |      | 0.2                              | 0.9 | -0.2 | 73                                               |
| 5              | Girls | -1.5                                      | -2.1 | -0.8 | -1.3 | -2.1 | -0.8 |      |      |      |      |      |      | 0.0                              | 0.5 | 0.0  | 30                                               |
|                | Boys  | -1.7                                      | -2.3 | -1.2 | -1.6 | -2.2 | -1.0 |      |      |      |      |      |      | 0.0                              | 0.6 | -0.3 | 36                                               |
| 6              | Girls | -1.4                                      | -2.5 | -0.6 |      |      |      |      |      |      |      |      |      | 0.1                              | 0.2 | 0.1  | 24                                               |
|                | Boys  | -1.8                                      | -2.7 | -1.2 |      |      |      |      |      |      |      |      |      | -0.1                             | 0.3 | -0.3 | 42                                               |
| <b>Total</b>   | Girls | -1.6                                      | -2.2 | -1.0 | -1.6 | -2.0 | -1.0 | -1.5 | -2.0 | -0.7 | -1.4 | -1.8 | -1.0 | 0.4                              | 1.0 | -0.1 | 54                                               |
|                | Boys  | -1.7                                      | -2.3 | -1.2 | -1.6 | -2.0 | -1.2 | -1.6 | -1.9 | -1.3 | -1.7 | -2.0 | -1.1 | 0.3                              | 1.1 | -0.1 | 61                                               |

245 **Notes:** T = total; S = stunted (HAZ < -2 SD); NS = not stunted (HAZ ≥ -2 SD).

246

247 **Appendix E: Comparison of annual growth rates in the three height categories, stunted,**  
248 **marginally-stunted, and not-stunted**

249 To compare the annual growth rates of children in the three height categories, we ran one  
250 regression with two dummy variables, one for stunted children and one for marginally-stunted  
251 children, using not-stunted children as the excluded category while controlling for all the  
252 variables indicated in Table 1. These results are shown in Table X, below. We found that stunted  
253 children grew by 0.03 cm/year less or 0.16 HAZ units/year more than not-stunted children, while  
254 marginally-stunted children grew by 0.13 cm/year less or 0.07 HAZ units/year more than not-  
255 stunted children; except for the growth of stunted children expressed as changes in HAZ, none of  
256 the other results were statistically significant at the 5% level or lower. Columns A2 and B2  
257 suggest that, on average, stunted children were 11.5 cm or 1.6 HAZ units shorter than not-  
258 stunted children, and that marginally-stunted children were 5.4 cm or 0.8 HAZ units shorter than  
259 not-stunted children, with all results significant at the 1% level.

260



261 **Table S6.** OLS regression results for height growth rates during 2002 - 2010 in relation to  
 262 baseline (2002) stunting among Tsimane' children  $2 \leq \text{age} \leq 7$  at baseline but no more than 11  
 263 years old by 2010.

| Explanatory variables | Dependent variable is standing height in 2010 or at age 11 when exiting the panel; height expressed in: |                                    |                     |                                 |
|-----------------------|---------------------------------------------------------------------------------------------------------|------------------------------------|---------------------|---------------------------------|
|                       | [A] Centimeters (cm)                                                                                    |                                    | [B] HAZ             |                                 |
|                       | [1] Change cm/year                                                                                      | [2] Height at the end of the study | [1] Change HAZ/year | [2] HAZ at the end of the study |
| I. Baseline stunting  |                                                                                                         |                                    |                     |                                 |
| Stunted               | -0.03 (0.26)                                                                                            | -11.54 (0.32)**                    | 0.16 (0.05)**       | -1.62 (0.05)**                  |
| Marginally- stunted   | -0.13 (0.27)                                                                                            | -5.42 (0.34)**                     | 0.07 (0.05)         | -0.82 (0.05)**                  |
| II. Child             |                                                                                                         |                                    |                     |                                 |
| Age                   | 0.03 (0.04)                                                                                             | 0.19 (0.05)**                      | 0.004 (0.01)        | -0.01 (0.01)*                   |
| Male                  | -0.78 (0.15)**                                                                                          | -3.24 (0.26)**                     | -0.05 (0.03)        | -0.29 (0.03)**                  |
| Survival              | 0.04 (0.06)                                                                                             | -0.57 (0.12)**                     | -0.002 (0.01)       | -0.07 (0.02)**                  |
| III. Constant         | 4.88 (0.94)**                                                                                           | 147.55 (1.27)**                    | -0.15 (0.20)        | 0.63 (0.18)**                   |
| R <sup>2</sup>        | 0.02                                                                                                    | 0.49                               | 0.02                | 0.50                            |
| N                     | 1,619                                                                                                   | 1,728                              | 1,619               | 1,728                           |

264 **Notes:** For definition of variables see Appendix E. OLS regressions include a child's age, sex, and  
 265 survival (number of times the child was measured in the panel), village fixed effects, constant, and robust  
 266 standard errors. \* and \*\* significant at  $< 5\%$  and  $< 1\%$ .

267 **Appendix F: Changes in height category among Tsimane' children at baseline and end-line**

268 **Table S7.** Changes in height category among Tsimane' children  $2 \leq \text{age} \leq 7$  at baseline (2002)  
 269 and end-line (2010) or age 11, whichever came first

| Height at the end<br>of the study: | Baseline height |                    |         | Total |
|------------------------------------|-----------------|--------------------|---------|-------|
|                                    | Not-stunted     | Marginally-stunted | Stunted |       |
| Not-stunted                        | 39              | 28                 | 9       | 76    |
| Marginally-stunted                 | 11              | 50                 | 39      | 100   |
| Stunted                            | 0               | 9                  | 68      | 77    |
| <b>Total</b>                       | 50              | 87                 | 116     | 253   |

270 **Notes:** Kendall's tau-b = 0.6 and ASE (asymptotic standard error) = 0.03. Children who dropped out of  
 271 the panel before reaching age 11 are excluded.
